# Supplementary material for: Quantum tunneling instability of the mythical hexazine and pentazine
Source: Royal Society of Chemistry journal article supplement (doi:10.1039/d3cc05840a), 2024-01-01
Supplement: d3cc05840a1.pdf [file d3cc05840a1.pdf]

# Quantum Tunneling Instability of the Mythical Hexazine and Pentazine

## Supporting Information

### Table of Contents

|                                                          |     |
|----------------------------------------------------------|-----|
| Theoretical Method                                       | S2  |
| Rate Constants                                           | S3  |
| LCT vs. SCT test                                         | S13 |
| KIE                                                      | S15 |
| dE+ZPE vs. Swain-Lupton R parameter / Hammett sigma-para | S17 |
| Free energy along the reaction path coordinates          | S18 |
| XYZ optimized geometries                                 | S19 |
| Example of Orca input file                               | S24 |
| Example of Polyrate input file                           | S25 |
| Full References                                          | S26 |

## Theoretical method

**Table S1.**  $N_6(D_2)$  to 3  $N_2$  decomposition energies in  $\text{kJ mol}^{-1}$  (not including ZPE) with selected methods

| Optimization method   | DE <sup>‡</sup> |
|-----------------------|-----------------|
| HCTH/Def2-TZVP        | 5.0             |
| TPSSH/Def2-TZVP       | 0.8             |
| MN15/Def2-TZVP        | 8.6             |
| PBE0/Def2-TZVP        | 4.8             |
| M062X/Def2-TZVP       | 0.1             |
| CCSD/cc-PVTZ          | Unstable        |
| DLPNO-CCSD(T)/cc-PVTZ | Unstable        |

**Table S2.** Static correlation diagnostic

|           | T1<br>React. | TS     | %TAE(T)<br>React. | TS  |
|-----------|--------------|--------|-------------------|-----|
| Hexazine  | 0.0260       | 0.0246 | 9.5               | 9.3 |
| Pentazine | 0.0144       | 0.0218 | 5.2               | 5.8 |

**Table S3.** Semiclassical (CVT) and tunneling included (CVT+SCT) decomposition rate constants in s<sup>-1</sup>.

| Hexazine (N <sub>6</sub> ) |          |          | Hexazine ( <sup>15</sup> N <sub>6</sub> ) |          |          |
|----------------------------|----------|----------|-------------------------------------------|----------|----------|
| T(K)                       | CVT      | CVT+SCT  | T(K)                                      | CVT      | CVT+SCT  |
| 4                          | 3.55E-47 | 3.58E+10 | 4                                         | 2.17E+10 | 2.54E+10 |
| 6                          | 7.24E-28 | 3.58E+10 | 6                                         | 2.17E+10 | 2.54E+10 |
| 8                          | 3.56E-18 | 3.58E+10 | 8                                         | 2.17E+10 | 2.54E+10 |
| 10                         | 2.45E-12 | 3.58E+10 | 10                                        | 2.17E+10 | 2.54E+10 |
| 20                         | 1.48E+00 | 3.59E+10 | 20                                        | 2.18E+10 | 2.55E+10 |
| 30                         | 1.50E+04 | 3.70E+10 | 30                                        | 2.26E+10 | 2.64E+10 |
| 40                         | 1.65E+06 | 3.99E+10 | 40                                        | 2.48E+10 | 2.88E+10 |
| 50                         | 2.91E+07 | 4.50E+10 | 50                                        | 2.85E+10 | 3.29E+10 |
| 75                         | 1.50E+09 | 6.86E+10 | 75                                        | 4.65E+10 | 5.20E+10 |
| 77.36                      | 1.92E+09 | 7.18E+10 | 77.36                                     | 4.90E+10 | 5.46E+10 |
| 100                        | 1.16E+10 | 1.12E+11 | 100                                       | 8.05E+10 | 8.73E+10 |
| 125                        | 4.16E+10 | 1.78E+11 | 125                                       | 1.35E+11 | 1.43E+11 |
| 150                        | 9.98E+10 | 2.70E+11 | 150                                       | 2.12E+11 | 2.25E+11 |
| 175                        | 1.90E+11 | 3.87E+11 | 175                                       | 3.12E+11 | 3.36E+11 |
| 194.7                      | 2.83E+11 | 4.91E+11 | 194.7                                     | 4.07E+11 | 4.41E+11 |
| 200                        | 3.11E+11 | 5.23E+11 | 200                                       | 4.35E+11 | 4.71E+11 |
| 225                        | 4.61E+11 | 6.87E+11 | 225                                       | 5.77E+11 | 6.26E+11 |
| 250                        | 6.36E+11 | 8.67E+11 | 250                                       | 7.37E+11 | 7.97E+11 |
| 273.15                     | 8.17E+11 | 1.05E+12 | 273.15                                    | 8.97E+11 | 9.68E+11 |
| 275                        | 8.32E+11 | 1.06E+12 | 275                                       | 9.10E+11 | 9.82E+11 |
| 298.15                     | 1.03E+12 | 1.25E+12 | 298.15                                    | 1.08E+12 | 1.16E+12 |
| 300                        | 1.05E+12 | 1.26E+12 | 300                                       | 1.09E+12 | 1.18E+12 |
| 325                        | 1.27E+12 | 1.47E+12 | 325                                       | 1.29E+12 | 1.38E+12 |
| 350                        | 1.51E+12 | 1.69E+12 | 350                                       | 1.48E+12 | 1.58E+12 |
| 373.15                     | 1.74E+12 | 1.88E+12 | 373.15                                    | 1.67E+12 | 1.78E+12 |
| 375                        | 1.75E+12 | 1.90E+12 | 375                                       | 1.69E+12 | 1.79E+12 |
| 400                        | 2.00E+12 | 2.11E+12 | 400                                       | 1.89E+12 | 2.00E+12 |

Pentazine (N<sub>5</sub>CH)

| T(K)   | CVT       | CVT+SCT  |
|--------|-----------|----------|
| 4      | 3.42E-253 | 3.91E+04 |
| 5      | 2.10E-200 | 3.91E+04 |
| 6      | 3.38E-165 | 3.91E+04 |
| 8      | 3.66E-121 | 3.91E+04 |
| 10     | 1.01E-94  | 3.91E+04 |
| 20     | 9.97E-42  | 3.91E+04 |
| 30     | 5.48E-24  | 3.92E+04 |
| 40     | 4.43E-15  | 3.96E+04 |
| 50     | 1.03E-09  | 4.10E+04 |
| 75     | 1.67E-02  | 5.33E+04 |
| 77.36  | 4.62E-02  | 5.55E+04 |
| 100    | 7.40E+01  | 1.01E+05 |
| 125    | 1.21E+04  | 3.72E+05 |
| 150    | 3.79E+05  | 2.45E+06 |
| 175    | 4.57E+06  | 1.53E+07 |
| 194.7  | 2.12E+07  | 5.27E+07 |
| 200    | 3.04E+07  | 7.15E+07 |
| 225    | 1.36E+08  | 2.57E+08 |
| 250    | 4.56E+08  | 7.50E+08 |
| 273.15 | 1.17E+09  | 1.74E+09 |
| 275    | 1.25E+09  | 1.85E+09 |
| 298.15 | 2.76E+09  | 3.81E+09 |
| 300    | 2.92E+09  | 4.02E+09 |
| 325    | 6.06E+09  | 7.84E+09 |
| 350    | 1.14E+10  | 1.41E+10 |
| 373.15 | 1.91E+10  | 2.27E+10 |
| 375    | 1.98E+10  | 2.35E+10 |
| 400    | 3.24E+10  | 3.71E+10 |

Pentazine (<sup>15</sup>N<sub>5</sub>CH)

| T(K)   | CVT       | CVT+SCT  |
|--------|-----------|----------|
| 4      | 1.84E-257 | 1.39E+04 |
| 5      | 8.07E-204 | 1.39E+04 |
| 6      | 4.82E-168 | 1.39E+04 |
| 8      | 2.69E-123 | 1.39E+04 |
| 10     | 1.99E-96  | 1.39E+04 |
| 20     | 1.40E-42  | 1.39E+04 |
| 30     | 1.48E-24  | 1.39E+04 |
| 40     | 1.66E-15  | 1.41E+04 |
| 50     | 4.70E-10  | 1.47E+04 |
| 75     | 9.89E-03  | 1.97E+04 |
| 77.36  | 2.78E-02  | 2.07E+04 |
| 100    | 5.01E+01  | 4.13E+04 |
| 125    | 8.88E+03  | 1.99E+05 |
| 150    | 2.93E+05  | 1.59E+06 |
| 175    | 3.68E+06  | 1.10E+07 |
| 194.7  | 1.74E+07  | 4.03E+07 |
| 200    | 2.52E+07  | 5.52E+07 |
| 225    | 1.15E+08  | 2.07E+08 |
| 250    | 3.93E+08  | 6.22E+08 |
| 273.15 | 1.02E+09  | 1.47E+09 |
| 275    | 1.09E+09  | 1.57E+09 |
| 298.15 | 2.44E+09  | 3.28E+09 |
| 300    | 2.59E+09  | 3.47E+09 |
| 325    | 5.42E+09  | 6.86E+09 |
| 350    | 1.03E+10  | 1.24E+10 |
| 373.15 | 1.73E+10  | 2.03E+10 |
| 375    | 1.80E+10  | 2.10E+10 |
| 400    | 2.96E+10  | 3.34E+10 |

Pentazine (N<sub>5</sub>CD)

| T(K)   | CVT       | CVT+SCT  |
|--------|-----------|----------|
| 4      | 1.62E-255 | 3.02E+04 |
| 5      | 2.90E-202 | 3.02E+04 |
| 6      | 9.51E-167 | 3.02E+04 |
| 8      | 2.51E-122 | 3.02E+04 |
| 10     | 1.19E-95  | 3.02E+04 |
| 20     | 3.41E-42  | 3.02E+04 |
| 30     | 2.67E-24  | 3.03E+04 |
| 40     | 2.58E-15  | 3.07E+04 |
| 50     | 6.70E-10  | 3.20E+04 |
| 75     | 1.25E-02  | 4.25E+04 |
| 77.36  | 3.48E-02  | 4.44E+04 |
| 100    | 5.94E+01  | 8.26E+04 |
| 125    | 1.02E+04  | 3.17E+05 |
| 150    | 3.26E+05  | 2.12E+06 |
| 175    | 4.02E+06  | 1.34E+07 |
| 194.7  | 1.89E+07  | 4.70E+07 |
| 200    | 2.72E+07  | 6.38E+07 |
| 225    | 1.23E+08  | 2.33E+08 |
| 250    | 4.17E+08  | 6.85E+08 |
| 273.15 | 1.08E+09  | 1.60E+09 |
| 275    | 1.15E+09  | 1.71E+09 |
| 298.15 | 2.56E+09  | 3.53E+09 |
| 300    | 2.72E+09  | 3.73E+09 |
| 325    | 5.66E+09  | 7.32E+09 |
| 350    | 1.07E+10  | 1.32E+10 |
| 373.15 | 1.80E+10  | 2.14E+10 |
| 375    | 1.87E+10  | 2.21E+10 |
| 400    | 3.07E+10  | 3.51E+10 |

Pentazine (N<sub>5</sub><sup>13</sup>CH)

| T(K)   | CVT       | CVT+SCT  |
|--------|-----------|----------|
| 4      | 9.03E-254 | 3.44E+04 |
| 5      | 7.24E-201 | 3.44E+04 |
| 6      | 1.39E-165 | 3.44E+04 |
| 8      | 1.88E-121 | 3.44E+04 |
| 10     | 5.95E-95  | 3.44E+04 |
| 20     | 7.63E-42  | 3.44E+04 |
| 30     | 4.58E-24  | 3.44E+04 |
| 40     | 3.87E-15  | 3.48E+04 |
| 50     | 9.27E-10  | 3.61E+04 |
| 75     | 1.55E-02  | 4.72E+04 |
| 77.36  | 4.31E-02  | 4.92E+04 |
| 100    | 7.01E+01  | 9.08E+04 |
| 125    | 1.16E+04  | 3.54E+05 |
| 150    | 3.65E+05  | 2.32E+06 |
| 175    | 4.44E+06  | 1.46E+07 |
| 194.7  | 2.06E+07  | 5.09E+07 |
| 200    | 2.96E+07  | 6.91E+07 |
| 225    | 1.32E+08  | 2.50E+08 |
| 250    | 4.47E+08  | 7.32E+08 |
| 273.15 | 1.14E+09  | 1.70E+09 |
| 275    | 1.23E+09  | 1.81E+09 |
| 298.15 | 2.71E+09  | 3.73E+09 |
| 300    | 2.88E+09  | 3.94E+09 |
| 325    | 5.97E+09  | 7.70E+09 |
| 350    | 1.12E+10  | 1.38E+10 |
| 373.15 | 1.88E+10  | 2.23E+10 |
| 375    | 1.96E+10  | 2.32E+10 |
| 400    | 3.20E+10  | 3.66E+10 |

Pentazine ( $^{15}\text{N}_5^{12}\text{CD}$ )

| T(K)   | CVT       | CVT+SCT  |
|--------|-----------|----------|
| 4      | 2.30E-260 | 9.52E+03 |
| 5      | 3.84E-206 | 9.52E+03 |
| 6      | 5.59E-170 | 9.52E+03 |
| 8      | 9.48E-125 | 9.52E+03 |
| 10     | 1.37E-97  | 9.52E+03 |
| 20     | 3.66E-43  | 9.52E+03 |
| 30     | 6.04E-25  | 9.55E+03 |
| 40     | 8.47E-16  | 9.71E+03 |
| 50     | 2.75E-10  | 1.02E+04 |
| 75     | 6.90E-03  | 1.41E+04 |
| 77.36  | 1.96E-02  | 1.48E+04 |
| 100    | 3.81E+01  | 3.07E+04 |
| 125    | 7.13E+03  | 1.48E+05 |
| 150    | 2.44E+05  | 1.31E+06 |
| 175    | 3.14E+06  | 9.36E+06 |
| 194.7  | 1.51E+07  | 3.47E+07 |
| 200    | 2.19E+07  | 4.78E+07 |
| 225    | 1.02E+08  | 1.82E+08 |
| 250    | 3.53E+08  | 5.55E+08 |
| 273.15 | 9.23E+08  | 1.33E+09 |
| 275    | 9.91E+08  | 1.42E+09 |
| 298.15 | 2.23E+09  | 2.99E+09 |
| 300    | 2.37E+09  | 3.16E+09 |
| 325    | 5.00E+09  | 6.30E+09 |
| 350    | 9.54E+09  | 1.15E+10 |
| 373.15 | 1.62E+10  | 1.88E+10 |
| 375    | 1.68E+10  | 1.95E+10 |
| 400    | 2.77E+10  | 3.12E+10 |

N(Me)<sub>2</sub>-Pentazine

| T(K)   | CVT       | CVT+SCT  |
|--------|-----------|----------|
| 4      |           |          |
| 5      |           |          |
| 6      |           |          |
| 8      | 1.08E-265 | 1.36E-06 |
| 10     | 2.31E-210 | 1.37E-06 |
| 20     | 1.15E-99  | 1.46E-06 |
| 30     | 9.08E-63  | 1.56E-06 |
| 40     | 2.51E-44  | 1.69E-06 |
| 50     | 2.89E-33  | 1.88E-06 |
| 75     | 1.66E-18  | 3.00E-06 |
| 77.36  | 1.32E-17  | 3.19E-06 |
| 100    | 4.20E-11  | 7.75E-06 |
| 125    | 1.22E-06  | 1.06E-04 |
| 150    | 1.21E-03  | 1.15E-02 |
| 175    | 1.72E-01  | 7.45E-01 |
| 194.7  | 3.58E+00  | 1.09E+01 |
| 200    | 7.33E+00  | 2.08E+01 |
| 225    | 1.39E+02  | 3.04E+02 |
| 250    | 1.48E+03  | 2.74E+03 |
| 273.15 | 9.19E+03  | 1.51E+04 |
| 275    | 1.05E+04  | 1.71E+04 |
| 298.15 | 4.85E+04  | 7.22E+04 |
| 300    | 5.42E+04  | 8.03E+04 |
| 325    | 2.20E+05  | 3.03E+05 |
| 350    | 7.36E+05  | 9.57E+05 |
| 373.15 | 1.96E+06  | 2.44E+06 |
| 375    | 2.11E+06  | 2.62E+06 |
| 400    | 5.34E+06  | 6.36E+06 |

NH<sub>2</sub>-Pentazine

| T(K)   | CVT       | CVT+SCT  |
|--------|-----------|----------|
| 4      |           |          |
| 5      |           |          |
| 6      | 4.38E-285 | 2.06E-02 |
| 8      | 4.42E-211 | 2.06E-02 |
| 10     | 1.18E-166 | 2.06E-02 |
| 20     | 1.06E-77  | 2.07E-02 |
| 30     | 5.61E-48  | 2.13E-02 |
| 40     | 4.38E-33  | 2.29E-02 |
| 50     | 3.92E-24  | 2.58E-02 |
| 75     | 3.72E-12  | 4.31E-02 |
| 77.36  | 2.01E-11  | 4.61E-02 |
| 100    | 3.98E-06  | 1.14E-01 |
| 125    | 1.76E-02  | 9.91E-01 |
| 150    | 5.01E+00  | 3.60E+01 |
| 175    | 2.95E+02  | 1.02E+03 |
| 194.7  | 3.58E+03  | 9.13E+03 |
| 200    | 6.46E+03  | 1.55E+04 |
| 225    | 7.31E+04  | 1.41E+05 |
| 250    | 5.19E+05  | 8.61E+05 |
| 273.15 | 2.35E+06  | 3.53E+06 |
| 275    | 2.62E+06  | 3.92E+06 |
| 298.15 | 9.33E+06  | 1.29E+07 |
| 300    | 1.02E+07  | 1.41E+07 |
| 325    | 3.28E+07  | 4.25E+07 |
| 350    | 8.96E+07  | 1.10E+08 |
| 373.15 | 2.03E+08  | 2.40E+08 |
| 375    | 2.15E+08  | 2.54E+08 |
| 400    | 4.66E+08  | 5.32E+08 |

## OH-Pentazine

| T(K)   | CVT       | CVT+SCT  |
|--------|-----------|----------|
| 4      |           |          |
| 5      |           |          |
| 6      | 2.23E-289 | 1.50E-02 |
| 8      | 2.67E-214 | 1.50E-02 |
| 10     | 3.13E-169 | 1.50E-02 |
| 20     | 5.48E-79  | 1.50E-02 |
| 30     | 7.85E-49  | 1.53E-02 |
| 40     | 1.02E-33  | 1.61E-02 |
| 50     | 1.24E-24  | 1.77E-02 |
| 75     | 1.79E-12  | 2.81E-02 |
| 77.36  | 9.91E-12  | 2.99E-02 |
| 100    | 2.36E-06  | 7.20E-02 |
| 125    | 1.18E-02  | 6.66E-01 |
| 150    | 3.61E+00  | 2.56E+01 |
| 175    | 2.24E+02  | 7.68E+02 |
| 194.7  | 2.80E+03  | 7.12E+03 |
| 200    | 5.10E+03  | 1.22E+04 |
| 225    | 5.94E+04  | 1.14E+05 |
| 250    | 4.32E+05  | 7.19E+05 |
| 273.15 | 1.99E+06  | 3.01E+06 |
| 275    | 2.23E+06  | 3.34E+06 |
| 298.15 | 8.04E+06  | 1.12E+07 |
| 300    | 8.84E+06  | 1.23E+07 |
| 325    | 2.87E+07  | 3.76E+07 |
| 350    | 7.93E+07  | 9.91E+07 |
| 373.15 | 1.81E+08  | 2.18E+08 |
| 375    | 1.93E+08  | 2.32E+08 |
| 400    | 4.22E+08  | 4.90E+08 |

## OMe-Pentazine

| T(K)   | CVT       | CVT+SCT  |
|--------|-----------|----------|
| 4      |           |          |
| 5      | 5.47E-290 | 8.40E-01 |
| 6      | 7.46E-240 | 8.40E-01 |
| 8      | 3.69E-177 | 8.40E-01 |
| 10     | 1.60E-139 | 8.40E-01 |
| 20     | 3.88E-64  | 8.44E-01 |
| 30     | 6.14E-39  | 8.76E-01 |
| 40     | 2.63E-26  | 9.57E-01 |
| 50     | 1.04E-18  | 1.10E+00 |
| 75     | 1.56E-08  | 1.98E+00 |
| 77.36  | 6.53E-08  | 2.14E+00 |
| 100    | 2.09E-03  | 6.54E+00 |
| 125    | 2.65E+00  | 9.53E+01 |
| 150    | 3.26E+02  | 2.50E+03 |
| 175    | 1.05E+04  | 4.08E+04 |
| 194.7  | 8.86E+04  | 2.51E+05 |
| 200    | 1.47E+05  | 3.90E+05 |
| 225    | 1.17E+06  | 2.45E+06 |
| 250    | 6.24E+06  | 1.12E+07 |
| 273.15 | 2.27E+07  | 3.66E+07 |
| 275    | 2.50E+07  | 3.99E+07 |
| 298.15 | 7.42E+07  | 1.10E+08 |
| 300    | 8.04E+07  | 1.18E+08 |
| 325    | 2.18E+08  | 3.00E+08 |
| 350    | 5.18E+08  | 6.77E+08 |
| 373.15 | 1.05E+09  | 1.32E+09 |
| 375    | 1.10E+09  | 1.38E+09 |
| 400    | 2.15E+09  | 2.60E+09 |



## OEt-Pentazine

| T(K)   | CVT       | CVT+SCT  |
|--------|-----------|----------|
| 4      |           |          |
| 5      | 3.68E-236 | 2.14E+02 |
| 6      | 5.36E-195 | 2.14E+02 |
| 8      | 1.61E-143 | 2.14E+02 |
| 10     | 1.31E-112 | 2.14E+02 |
| 20     | 1.10E-50  | 2.19E+02 |
| 30     | 5.62E-30  | 2.38E+02 |
| 40     | 1.37E-19  | 2.74E+02 |
| 50     | 2.46E-13  | 3.28E+02 |
| 75     | 6.02E-05  | 6.03E+02 |
| 77.36  | 1.96E-04  | 6.47E+02 |
| 100    | 1.04E+00  | 1.59E+03 |
| 125    | 3.88E+02  | 1.00E+04 |
| 150    | 2.11E+04  | 1.20E+05 |
| 175    | 3.82E+05  | 1.17E+06 |
| 194.7  | 2.26E+06  | 5.29E+06 |
| 200    | 3.44E+06  | 7.62E+06 |
| 225    | 1.95E+07  | 3.53E+07 |
| 250    | 7.98E+07  | 1.26E+08 |
| 273.15 | 2.37E+08  | 3.40E+08 |
| 275    | 2.57E+08  | 3.66E+08 |
| 298.15 | 6.42E+08  | 8.53E+08 |
| 300    | 6.87E+08  | 9.08E+08 |
| 325    | 1.60E+09  | 1.99E+09 |
| 350    | 3.32E+09  | 3.94E+09 |
| 373.15 | 6.01E+09  | 6.88E+09 |
| 375    | 6.29E+09  | 7.18E+09 |
| 400    | 1.11E+10  | 1.22E+10 |

## Me-Pentazine

| T(K)   | CVT       | CVT+SCT  |
|--------|-----------|----------|
| 4      | 5.52E-236 | 6.51E+03 |
| 5      | 1.22E-186 | 6.51E+03 |
| 6      | 9.89E-154 | 6.51E+03 |
| 8      | 1.43E-112 | 6.53E+03 |
| 10     | 7.43E-88  | 6.56E+03 |
| 20     | 2.29E-38  | 6.99E+03 |
| 30     | 7.55E-22  | 7.69E+03 |
| 40     | 1.39E-13  | 8.66E+03 |
| 50     | 1.27E-08  | 1.00E+04 |
| 75     | 5.42E-02  | 1.70E+04 |
| 77.36  | 1.38E-01  | 1.81E+04 |
| 100    | 1.18E+02  | 4.29E+04 |
| 125    | 1.25E+04  | 2.16E+05 |
| 150    | 2.89E+05  | 1.48E+06 |
| 175    | 2.81E+06  | 8.28E+06 |
| 194.7  | 1.14E+07  | 2.61E+07 |
| 200    | 1.59E+07  | 3.45E+07 |
| 225    | 6.22E+07  | 1.12E+08 |
| 250    | 1.89E+08  | 2.97E+08 |
| 273.15 | 4.44E+08  | 6.41E+08 |
| 275    | 4.73E+08  | 6.78E+08 |
| 298.15 | 9.76E+08  | 1.31E+09 |
| 300    | 1.03E+09  | 1.36E+09 |
| 325    | 2.00E+09  | 2.50E+09 |
| 350    | 3.57E+09  | 4.26E+09 |
| 373.15 | 5.72E+09  | 6.58E+09 |
| 375    | 5.93E+09  | 6.80E+09 |
| 400    | 9.27E+09  | 1.03E+10 |

## F-Pentazine

| T(K)   | CVT       | CVT+SCT  |
|--------|-----------|----------|
| 4      |           |          |
| 5      |           |          |
| 6      | 5.51E-263 | 1.78E-01 |
| 8      | 1.66E-194 | 1.78E-01 |
| 10     | 2.13E-153 | 1.78E-01 |
| 20     | 4.51E-71  | 1.78E-01 |
| 30     | 1.49E-43  | 1.81E-01 |
| 40     | 9.31E-30  | 1.89E-01 |
| 50     | 1.86E-21  | 2.09E-01 |
| 75     | 2.45E-10  | 3.37E-01 |
| 77.36  | 1.18E-09  | 3.60E-01 |
| 100    | 9.84E-05  | 9.32E-01 |
| 125    | 2.42E-01  | 9.80E+00 |
| 150    | 4.61E+01  | 3.07E+02 |
| 175    | 2.04E+03  | 6.85E+03 |
| 194.7  | 2.07E+04  | 5.20E+04 |
| 200    | 3.59E+04  | 8.47E+04 |
| 225    | 3.42E+05  | 6.51E+05 |
| 250    | 2.11E+06  | 3.48E+06 |
| 273.15 | 8.58E+06  | 1.29E+07 |
| 275    | 9.51E+06  | 1.42E+07 |
| 298.15 | 3.09E+07  | 4.29E+07 |
| 300    | 3.37E+07  | 4.65E+07 |
| 325    | 9.94E+07  | 1.29E+08 |
| 350    | 2.53E+08  | 3.13E+08 |
| 373.15 | 5.40E+08  | 6.45E+08 |
| 375    | 5.71E+08  | 6.81E+08 |
| 400    | 1.17E+09  | 1.35E+09 |

## Cl-Pentazine

| T(K)   | CVT       | CVT+SCT  |
|--------|-----------|----------|
| 4      | 6.32E-278 | 1.09E+03 |
| 5      | 3.40E-220 | 1.09E+03 |
| 6      | 1.08E-181 | 1.09E+03 |
| 8      | 1.54E-133 | 1.09E+03 |
| 10     | 1.26E-104 | 1.09E+03 |
| 20     | 1.08E-46  | 1.09E+03 |
| 30     | 2.60E-27  | 1.13E+03 |
| 40     | 1.37E-17  | 1.23E+03 |
| 50     | 9.71E-12  | 1.40E+03 |
| 75     | 6.75E-04  | 2.33E+03 |
| 77.36  | 2.04E-03  | 2.49E+03 |
| 100    | 6.13E+00  | 5.90E+03 |
| 125    | 1.54E+03  | 3.49E+04 |
| 150    | 6.43E+04  | 3.54E+05 |
| 175    | 9.55E+05  | 2.87E+06 |
| 194.7  | 5.01E+06  | 1.15E+07 |
| 200    | 7.42E+06  | 1.62E+07 |
| 225    | 3.74E+07  | 6.67E+07 |
| 250    | 1.39E+08  | 2.16E+08 |
| 273.15 | 3.82E+08  | 5.44E+08 |
| 275    | 4.11E+08  | 5.82E+08 |
| 298.15 | 9.65E+08  | 1.28E+09 |
| 300    | 1.03E+09  | 1.36E+09 |
| 325    | 2.25E+09  | 2.81E+09 |
| 350    | 4.45E+09  | 5.30E+09 |
| 373.15 | 7.75E+09  | 8.91E+09 |
| 375    | 8.08E+09  | 9.27E+09 |
| 400    | 1.37E+10  | 1.52E+10 |

## Br-Pentazine

| T(K)   | CVT       | CVT+SCT  |
|--------|-----------|----------|
| 4      | 2.26E-257 | 4.57E+03 |
| 5      | 9.41E-204 | 4.57E+03 |
| 6      | 5.42E-168 | 4.57E+03 |
| 8      | 2.89E-123 | 4.57E+03 |
| 10     | 2.08E-96  | 4.57E+03 |
| 20     | 1.38E-42  | 4.62E+03 |
| 30     | 1.40E-24  | 4.83E+03 |
| 40     | 1.50E-15  | 5.30E+03 |
| 50     | 4.07E-10  | 6.07E+03 |
| 75     | 7.82E-03  | 1.02E+04 |
| 77.36  | 2.18E-02  | 1.09E+04 |
| 100    | 3.72E+01  | 2.54E+04 |
| 125    | 6.34E+03  | 1.32E+05 |
| 150    | 2.03E+05  | 1.10E+06 |
| 175    | 2.49E+06  | 7.54E+06 |
| 194.7  | 1.17E+07  | 2.71E+07 |
| 200    | 1.68E+07  | 3.70E+07 |
| 225    | 7.56E+07  | 1.37E+08 |
| 250    | 2.56E+08  | 4.05E+08 |
| 273.15 | 6.58E+08  | 9.52E+08 |
| 275    | 7.05E+08  | 1.01E+09 |
| 298.15 | 1.56E+09  | 2.10E+09 |
| 300    | 1.66E+09  | 2.22E+09 |
| 325    | 3.45E+09  | 4.36E+09 |
| 350    | 6.50E+09  | 7.86E+09 |
| 373.15 | 1.09E+10  | 1.27E+10 |
| 375    | 1.13E+10  | 1.32E+10 |
| 400    | 1.85E+10  | 2.09E+10 |

CF<sub>3</sub>-Pentazine

| T(K)   | CVT       | CVT+SCT  |
|--------|-----------|----------|
| 4      | 1.45E-184 | 5.68E+05 |
| 5      | 1.64E-145 | 5.69E+05 |
| 6      | 1.82E-119 | 5.70E+05 |
| 8      | 6.91E-87  | 5.73E+05 |
| 10     | 2.51E-67  | 5.79E+05 |
| 20     | 3.62E-28  | 6.28E+05 |
| 30     | 4.32E-15  | 7.10E+05 |
| 40     | 1.54E-08  | 8.27E+05 |
| 50     | 1.35E-04  | 9.86E+05 |
| 75     | 2.65E+01  | 1.71E+06 |
| 77.36  | 5.60E+01  | 1.82E+06 |
| 100    | 1.26E+04  | 3.76E+06 |
| 125    | 5.38E+05  | 1.16E+07 |
| 150    | 6.81E+06  | 4.28E+07 |
| 175    | 4.30E+07  | 1.46E+08 |
| 194.7  | 1.34E+08  | 3.41E+08 |
| 200    | 1.75E+08  | 4.21E+08 |
| 225    | 5.31E+08  | 1.03E+09 |
| 250    | 1.31E+09  | 2.19E+09 |
| 273.15 | 2.64E+09  | 3.98E+09 |
| 275    | 2.78E+09  | 4.17E+09 |
| 298.15 | 5.02E+09  | 6.98E+09 |
| 300    | 5.25E+09  | 7.25E+09 |
| 325    | 9.06E+09  | 1.16E+10 |
| 350    | 1.45E+10  | 1.77E+10 |
| 373.15 | 2.14E+10  | 2.50E+10 |
| 375    | 2.20E+10  | 2.57E+10 |
| 400    | 3.18E+10  | 3.58E+10 |

## CN-Pentazine

| T(K)   | CVT       | CVT+SCT  |
|--------|-----------|----------|
| 4      | 3.13E-227 | 1.09E+05 |
| 5      | 1.22E-179 | 1.09E+05 |
| 6      | 6.70E-148 | 1.09E+05 |
| 8      | 3.38E-108 | 1.09E+05 |
| 10     | 2.35E-84  | 1.09E+05 |
| 20     | 1.46E-36  | 1.09E+05 |
| 30     | 1.46E-20  | 1.13E+05 |
| 40     | 1.57E-12  | 1.21E+05 |
| 50     | 1.07E-07  | 1.35E+05 |
| 75     | 3.21E-01  | 2.11E+05 |
| 77.36  | 7.99E-01  | 2.22E+05 |
| 100    | 5.93E+02  | 4.47E+05 |
| 125    | 5.65E+04  | 1.59E+06 |
| 150    | 1.22E+06  | 8.18E+06 |
| 175    | 1.12E+07  | 3.89E+07 |
| 194.7  | 4.40E+07  | 1.14E+08 |
| 200    | 6.08E+07  | 1.48E+08 |
| 225    | 2.30E+08  | 4.50E+08 |
| 250    | 6.79E+08  | 1.15E+09 |
| 273.15 | 1.57E+09  | 2.40E+09 |
| 275    | 1.67E+09  | 2.53E+09 |
| 298.15 | 3.38E+09  | 4.77E+09 |
| 300    | 3.56E+09  | 5.00E+09 |
| 325    | 6.82E+09  | 9.01E+09 |
| 350    | 1.20E+10  | 1.51E+10 |
| 373.15 | 1.90E+10  | 2.30E+10 |
| 375    | 1.96E+10  | 2.38E+10 |
| 400    | 3.04E+10  | 3.56E+10 |

NO<sub>2</sub>-Pentazine

| T(K)   | CVT       | CVT+SCT  |
|--------|-----------|----------|
| 4      | 1.05E-212 | 6.33E+04 |
| 5      | 5.09E-168 | 6.33E+04 |
| 6      | 3.24E-138 | 6.33E+04 |
| 8      | 6.20E-101 | 6.33E+04 |
| 10     | 1.52E-78  | 6.34E+04 |
| 20     | 1.13E-33  | 6.60E+04 |
| 30     | 1.15E-18  | 7.30E+04 |
| 40     | 3.88E-11  | 8.46E+04 |
| 50     | 1.32E-06  | 1.02E+05 |
| 75     | 1.61E+00  | 1.87E+05 |
| 77.36  | 3.79E+00  | 2.01E+05 |
| 100    | 1.93E+03  | 4.87E+05 |
| 125    | 1.44E+05  | 2.25E+06 |
| 150    | 2.67E+06  | 1.32E+07 |
| 175    | 2.22E+07  | 6.39E+07 |
| 194.7  | 8.18E+07  | 1.84E+08 |
| 200    | 1.11E+08  | 2.38E+08 |
| 225    | 4.00E+08  | 7.06E+08 |
| 250    | 1.13E+09  | 1.75E+09 |
| 273.15 | 2.52E+09  | 3.58E+09 |
| 275    | 2.68E+09  | 3.77E+09 |
| 298.15 | 5.28E+09  | 6.95E+09 |
| 300    | 5.55E+09  | 7.28E+09 |
| 325    | 1.04E+10  | 1.27E+10 |
| 350    | 1.79E+10  | 2.08E+10 |
| 373.15 | 2.78E+10  | 3.12E+10 |
| 375    | 2.88E+10  | 3.22E+10 |
| 400    | 4.38E+10  | 4.75E+10 |

## LCT (Large Curvature Tunneling) test for hexazine and pentazine decomposition.

To examine the impact of LCT on the decomposition rate, we tested its performance using the MN15 functional, but with a smaller basis set and larger steps (sstep=0.005). The results showed that for both pentazine and hexazine, SCT is the preferred path for QTI.

### Pentazine (MN15/6-31G)

| T(K)   | CVT       | CVT+SCT  | CVT+LCG4 |
|--------|-----------|----------|----------|
| 4      | 6.06E-103 | 2.20E+08 | 1.46E+08 |
| 5      | 3.28E-80  | 2.20E+08 | 1.46E+08 |
| 6      | 4.86E-65  | 2.20E+08 | 1.46E+08 |
| 8      | 4.73E-46  | 2.20E+08 | 1.46E+08 |
| 10     | 1.23E-34  | 2.20E+08 | 1.46E+08 |
| 20     | 1.07E-11  | 2.20E+08 | 1.46E+08 |
| 30     | 5.63E-04  | 2.20E+08 | 1.47E+08 |
| 40     | 4.47E+00  | 2.24E+08 | 1.49E+08 |
| 50     | 1.04E+03  | 2.37E+08 | 1.59E+08 |
| 75     | 1.69E+06  | 3.73E+08 | 2.65E+08 |
| 77.36  | 2.68E+06  | 4.01E+08 | 2.88E+08 |
| 100    | 7.67E+07  | 1.01E+09 | 8.16E+08 |
| 125    | 8.07E+08  | 3.39E+09 | 2.99E+09 |
| 150    | 4.05E+09  | 1.00E+10 | 9.23E+09 |
| 175    | 1.32E+10  | 2.44E+10 | 2.31E+10 |
| 194.7  | 2.74E+10  | 4.39E+10 | 4.20E+10 |
| 200    | 3.26E+10  | 5.06E+10 | 4.86E+10 |
| 225    | 6.70E+10  | 9.25E+10 | 8.96E+10 |
| 250    | 1.21E+11  | 1.53E+11 | 1.49E+11 |
| 273.15 | 1.90E+11  | 2.28E+11 | 2.23E+11 |
| 275    | 1.97E+11  | 2.35E+11 | 2.30E+11 |
| 298.15 | 2.89E+11  | 3.31E+11 | 3.25E+11 |
| 300    | 2.98E+11  | 3.39E+11 | 3.33E+11 |
| 325    | 4.25E+11  | 4.66E+11 | 4.59E+11 |
| 350    | 5.78E+11  | 6.14E+11 | 6.06E+11 |
| 373.15 | 7.43E+11  | 7.70E+11 | 7.61E+11 |
| 375    | 7.57E+11  | 7.83E+11 | 7.74E+11 |
| 400    | 9.60E+11  | 9.70E+11 | 9.61E+11 |

## Hexazine (MN15/Def2-SVP)

| T(K)   | CVT       | CVT+SCT  | CVT+LCG4 |
|--------|-----------|----------|----------|
| 4      | 7.01E-119 | 3.24E+08 | 2.66E+08 |
| 5      | 5.35E-93  | 2.96E+08 | 2.43E+08 |
| 6      | 9.80E-76  | 2.73E+08 | 2.25E+08 |
| 8      | 3.85E-54  | 2.41E+08 | 1.98E+08 |
| 10     | 3.59E-41  | 2.20E+08 | 1.81E+08 |
| 20     | 3.80E-15  | 1.83E+08 | 1.51E+08 |
| 30     | 8.41E-06  | 6.76E+08 | 5.57E+08 |
| 40     | 2.15E-01  | 7.41E+08 | 6.13E+08 |
| 50     | 9.96E+01  | 8.36E+08 | 6.95E+08 |
| 75     | 3.99E+05  | 1.29E+09 | 1.10E+09 |
| 77.36  | 6.65E+05  | 1.36E+09 | 1.17E+09 |
| 100    | 2.74E+07  | 2.42E+09 | 2.16E+09 |
| 125    | 2.17E+08  | 3.16E+09 | 2.93E+09 |
| 150    | 1.26E+09  | 7.03E+09 | 6.72E+09 |
| 175    | 4.50E+09  | 1.47E+10 | 1.42E+10 |
| 194.7  | 9.88E+09  | 2.45E+10 | 2.40E+10 |
| 200    | 1.19E+10  | 2.79E+10 | 2.73E+10 |
| 225    | 2.57E+10  | 4.84E+10 | 4.77E+10 |
| 250    | 4.80E+10  | 7.76E+10 | 7.69E+10 |
| 273.15 | 7.79E+10  | 1.14E+11 | 1.13E+11 |
| 275    | 8.07E+10  | 1.17E+11 | 1.16E+11 |
| 298.15 | 1.22E+11  | 1.62E+11 | 1.61E+11 |
| 300    | 1.25E+11  | 1.66E+11 | 1.65E+11 |
| 325    | 1.82E+11  | 2.27E+11 | 2.25E+11 |
| 350    | 2.52E+11  | 2.97E+11 | 2.96E+11 |
| 373.15 | 3.29E+11  | 3.72E+11 | 3.70E+11 |
| 375    | 3.36E+11  | 3.78E+11 | 3.77E+11 |
| 400    | 4.32E+11  | 4.69E+11 | 4.68E+11 |

## Kinetic Isotope Effect from CVT+SCT rate constants

**Table S4.** Hexazine KIE

| T(K)   | $^{14}\text{N}_6/^{15}\text{N}_6$ |
|--------|-----------------------------------|
| 4      | 1.41                              |
| 6      | 1.41                              |
| 8      | 1.41                              |
| 10     | 1.41                              |
| 20     | 1.41                              |
| 30     | 1.40                              |
| 40     | 1.39                              |
| 50     | 1.37                              |
| 75     | 1.32                              |
| 77.36  | 1.32                              |
| 100    | 1.28                              |
| 125    | 1.24                              |
| 150    | 1.20                              |
| 175    | 1.15                              |
| 194.7  | 1.11                              |
| 200    | 1.11                              |
| 225    | 1.10                              |
| 250    | 1.09                              |
| 273.15 | 1.08                              |
| 275    | 1.08                              |
| 298.15 | 1.08                              |
| 300    | 1.07                              |
| 325    | 1.07                              |
| 350    | 1.07                              |
| 373.15 | 1.06                              |
| 375    | 1.06                              |
| 400    | 1.06                              |

**Table S5.** Pentazine- KIE

| T(K)   | $N_5CH/N_5CD$ | $N_5^{12}CH/N_5^{13}CH$ | $^{14}N_5CH/^{15}N_5CH$ | $^{14}N_5^{12}CH/^{15}N_5^{13}CD$ |
|--------|---------------|-------------------------|-------------------------|-----------------------------------|
| 4      | 1.29          | 1.14                    | 2.81                    | 4.11                              |
| 5      | 1.29          | 1.14                    | 2.81                    | 4.11                              |
| 6      | 1.29          | 1.14                    | 2.81                    | 4.11                              |
| 8      | 1.29          | 1.14                    | 2.81                    | 4.11                              |
| 10     | 1.29          | 1.14                    | 2.81                    | 4.11                              |
| 20     | 1.29          | 1.14                    | 2.81                    | 4.11                              |
| 30     | 1.29          | 1.14                    | 2.82                    | 4.10                              |
| 40     | 1.29          | 1.14                    | 2.81                    | 4.08                              |
| 50     | 1.28          | 1.14                    | 2.79                    | 4.02                              |
| 75     | 1.25          | 1.13                    | 2.71                    | 3.78                              |
| 77.36  | 1.25          | 1.13                    | 2.68                    | 3.75                              |
| 100    | 1.22          | 1.11                    | 2.45                    | 3.29                              |
| 125    | 1.17          | 1.05                    | 1.87                    | 2.51                              |
| 150    | 1.16          | 1.06                    | 1.54                    | 1.87                              |
| 175    | 1.14          | 1.05                    | 1.39                    | 1.63                              |
| 194.7  | 1.12          | 1.04                    | 1.31                    | 1.52                              |
| 200    | 1.12          | 1.03                    | 1.30                    | 1.50                              |
| 225    | 1.10          | 1.03                    | 1.24                    | 1.41                              |
| 250    | 1.09          | 1.02                    | 1.21                    | 1.35                              |
| 273.15 | 1.09          | 1.02                    | 1.18                    | 1.31                              |
| 275    | 1.08          | 1.02                    | 1.18                    | 1.30                              |
| 298.15 | 1.08          | 1.02                    | 1.16                    | 1.27                              |
| 300    | 1.08          | 1.02                    | 1.16                    | 1.27                              |
| 325    | 1.07          | 1.02                    | 1.14                    | 1.24                              |
| 350    | 1.07          | 1.02                    | 1.14                    | 1.23                              |
| 373.15 | 1.06          | 1.02                    | 1.12                    | 1.21                              |
| 375    | 1.06          | 1.01                    | 1.12                    | 1.21                              |
| 400    | 1.06          | 1.01                    | 1.11                    | 1.19                              |



Correlation between  $\Delta E^\ddagger + \text{ZPE}$  and the Swain-Lupton resonance parameter (R) / Hammett sigma-para

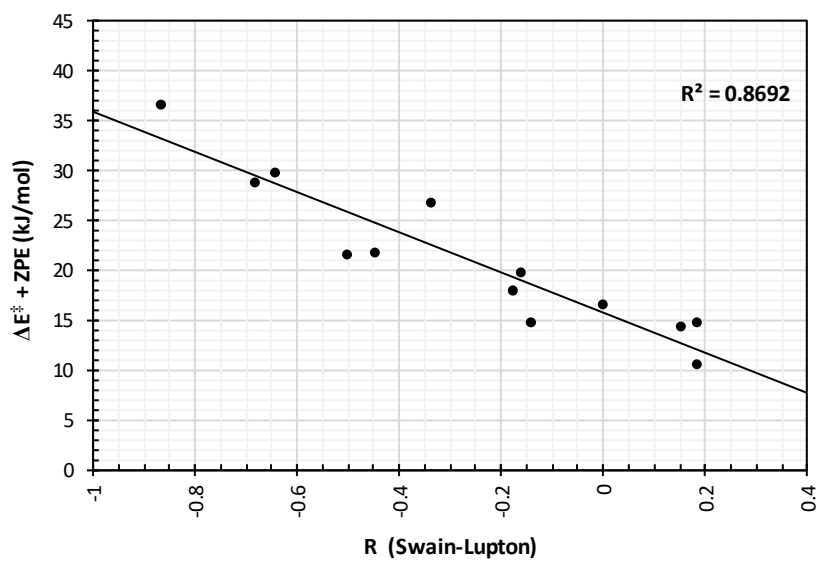

**Figure S1.**  $\Delta E^\ddagger + \text{ZPE}$  vs. Swain-Lupton R parameter, using the Hammett equation substituents for replacing the pentazine hydrogen (see table 2 in the main text).

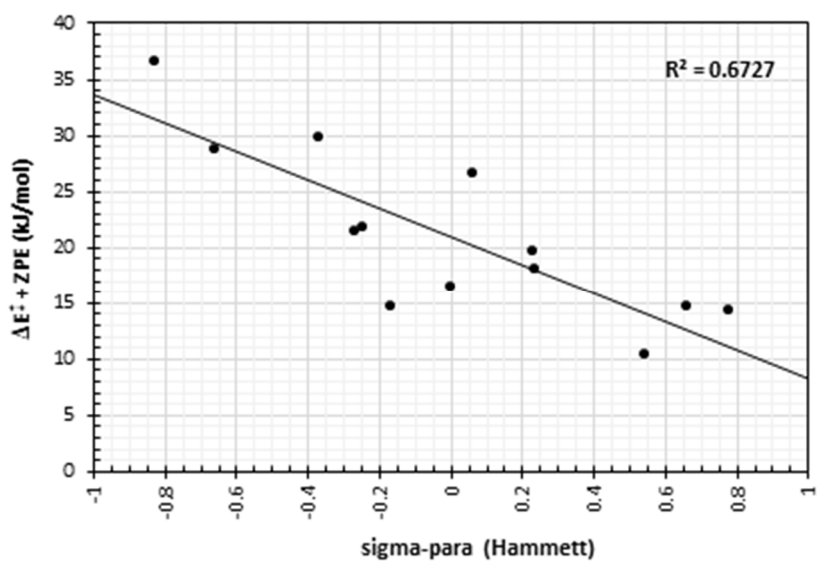

**Figure S2.**  $\Delta E^\ddagger + \text{ZPE}$  vs. Hammett sigma-para parameter.

## Free energy along the reaction path coordinates

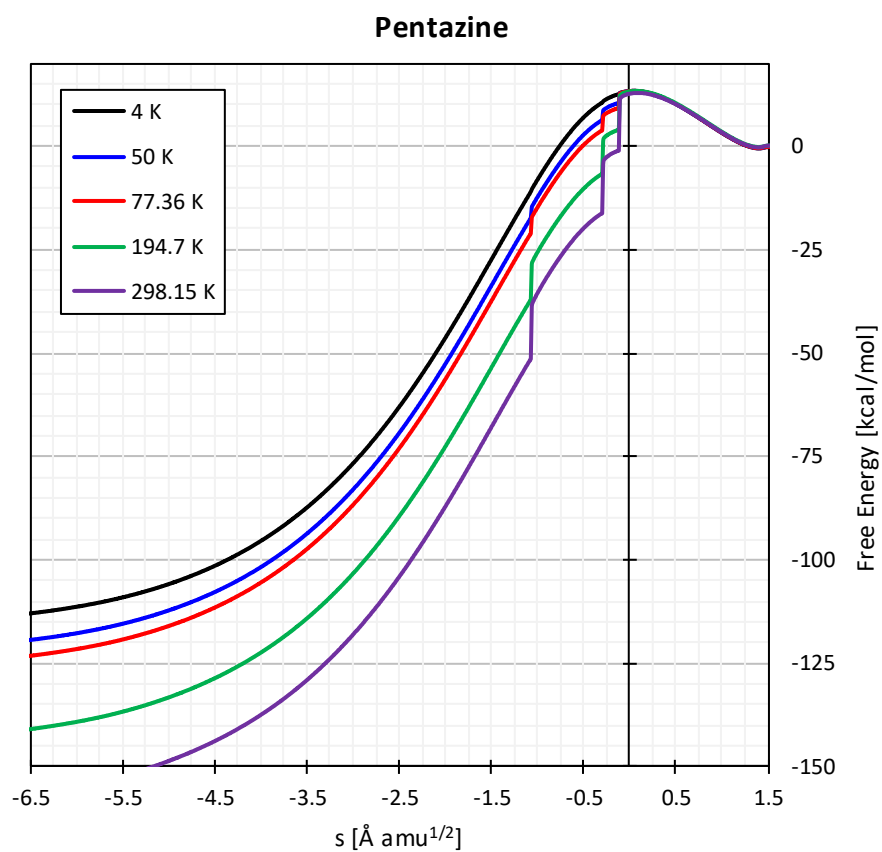

**Figure S3.** Free energy vs. reaction path coordinate of pentazine, in various temperatures.

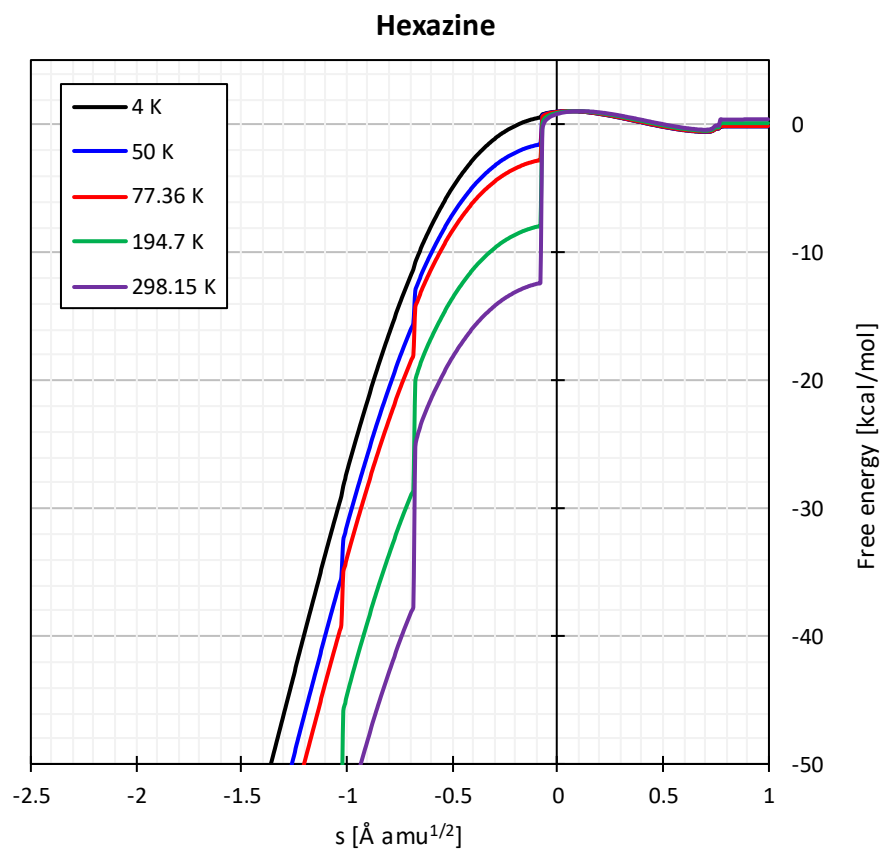

**Figure S4.** Free energy vs. reaction path coordinate of hexazine, in various temperatures.

## XYZ optimized geometries at the MN15/Def2-TZVP level.

### Hexazine (N<sub>6</sub>)

| Reactant |           |           |           | Transition state |           |           |           |
|----------|-----------|-----------|-----------|------------------|-----------|-----------|-----------|
| N        | 1.127765  | 0.640791  | 0.133137  | N                | -1.192705 | -0.589226 | 0.164252  |
| N        | 1.127757  | -0.640801 | -0.133149 | N                | -1.192745 | 0.589170  | -0.164158 |
| N        | 0.000006  | 1.287474  | 0.000126  | N                | 0.073493  | -1.320175 | 0.005447  |
| N        | -0.000006 | -1.287474 | -0.000125 | N                | 0.073426  | 1.320176  | -0.005438 |
| N        | -1.127759 | 0.640827  | -0.133012 | N                | 1.119276  | -0.713914 | -0.145550 |
| N        | -1.127763 | -0.640817 | 0.133025  | N                | 1.119254  | 0.713968  | 0.145447  |

### Pentazine (N<sub>5</sub>CH)

| Reactant |           |           |           | Transition state |           |           |           |
|----------|-----------|-----------|-----------|------------------|-----------|-----------|-----------|
| C        | 0.000000  | 0.000000  | -1.250593 | C                | -1.145320 | -0.640051 | 0.090252  |
| N        | 0.000000  | 1.171841  | -0.631606 | N                | -0.193972 | -1.407692 | -0.103049 |
| N        | -0.000000 | -1.171841 | -0.631606 | N                | -1.077228 | 0.849699  | -0.024552 |
| N        | 0.000000  | 1.145996  | 0.675704  | N                | 1.260437  | -0.682346 | -0.015609 |
| N        | -0.000000 | -1.145996 | 0.675704  | N                | -0.056156 | 1.444900  | -0.068409 |
| N        | 0.000000  | -0.000000 | 1.317064  | N                | 1.357572  | 0.482693  | 0.098958  |
| H        | 0.000000  | 0.000000  | -2.333265 | H                | -2.162653 | -0.970476 | 0.247118  |

### Pentazine substituents

#### N(Me)<sub>2</sub>-Pentazine

| Reactant |           |           |           | Transition state |           |           |           |
|----------|-----------|-----------|-----------|------------------|-----------|-----------|-----------|
| C        | -0.013729 | 0.092859  | 0.000000  | C                | 0.134274  | -0.148810 | -0.035269 |
| N        | -0.057114 | -0.561699 | 1.178834  | N                | -0.478272 | -1.234270 | 0.048883  |
| N        | -0.057114 | -0.561699 | -1.178834 | N                | -0.524679 | 1.219742  | -0.118434 |
| N        | -0.057114 | -1.854546 | 1.140179  | N                | -2.121710 | -1.116323 | 0.081928  |
| N        | -0.057114 | -1.854546 | -1.140179 | N                | -1.679997 | 1.407952  | -0.083332 |
| N        | -0.028246 | -2.512819 | 0.000000  | N                | -2.679624 | -0.094233 | 0.062280  |
| N        | 0.057039  | 1.429121  | 0.000000  | N                | 1.477574  | -0.013751 | -0.127316 |
| C        | 0.080145  | 2.201455  | -1.227375 | C                | 2.201734  | 1.208466  | 0.170860  |
| H        | 0.972078  | 2.831375  | -1.244286 | H                | 3.028266  | 1.310376  | -0.533188 |
| H        | 0.086580  | 1.540220  | -2.086884 | H                | 1.557198  | 2.075408  | 0.075524  |
| H        | -0.799525 | 2.847759  | -1.274037 | H                | 2.611988  | 1.179828  | 1.185340  |
| C        | 0.080145  | 2.201455  | 1.227375  | C                | 2.248512  | -1.240511 | -0.069333 |
| H        | -0.799525 | 2.847759  | 1.274037  | H                | 2.318589  | -1.622802 | 0.953917  |
| H        | 0.086580  | 1.540220  | 2.086884  | H                | 1.772203  | -2.002292 | -0.683333 |
| H        | 0.972078  | 2.831375  | 1.244286  | H                | 3.251595  | -1.039203 | -0.443872 |

#### NH<sub>2</sub>-Pentazine

| Reactant |          |           |           | Transition state |           |           |          |
|----------|----------|-----------|-----------|------------------|-----------|-----------|----------|
| C        | 0.000000 | 0.000000  | 0.821049  | C                | 0.000000  | 0.887982  | 0.000000 |
| N        | 0.000000 | 1.180658  | 0.184103  | N                | 1.187803  | 0.518045  | 0.000000 |
| N        | 0.000000 | -1.180658 | 0.184103  | N                | -1.233758 | -0.022165 | 0.000000 |
| N        | 0.000000 | 1.142763  | -1.111758 | N                | 1.388290  | -1.098804 | 0.000000 |
| N        | 0.000000 | -1.142763 | -1.111758 | N                | -1.173648 | -1.193265 | 0.000000 |
| N        | 0.000000 | 0.000000  | -1.765214 | N                | 0.498069  | -1.852649 | 0.000000 |
| N        | 0.000000 | 0.000000  | 2.158364  | N                | -0.476806 | 2.144181  | 0.000000 |
| H        | 0.000000 | 0.877251  | 2.654416  | H                | 0.148659  | 2.932561  | 0.000000 |
| H        | 0.000000 | -0.877251 | 2.654416  | H                | -1.478312 | 2.272147  | 0.000000 |

## OH-Pentazine

| Reactant |           |           |          |
|----------|-----------|-----------|----------|
| C        | 0.000000  | 0.828501  | 0.000000 |
| N        | 1.190625  | 0.235701  | 0.000000 |
| N        | -1.159744 | 0.181358  | 0.000000 |
| N        | 1.179739  | -1.064711 | 0.000000 |
| N        | -1.105540 | -1.120789 | 0.000000 |
| N        | 0.048971  | -1.740779 | 0.000000 |
| O        | -0.017130 | 2.143762  | 0.000000 |
| H        | -0.941313 | 2.443442  | 0.000000 |

| Transition state |           |           |          |
|------------------|-----------|-----------|----------|
| C                | 0.000000  | 0.903986  | 0.000000 |
| N                | 1.187512  | 0.561730  | 0.000000 |
| N                | -1.200445 | -0.005633 | 0.000000 |
| N                | 1.390874  | -1.077382 | 0.000000 |
| N                | -1.156337 | -1.179714 | 0.000000 |
| N                | 0.498700  | -1.827757 | 0.000000 |
| O                | -0.452055 | 2.145392  | 0.000000 |
| H                | -1.425689 | 2.114239  | 0.000000 |

## OMe-Pentazine

| Reactant |           |           |           |
|----------|-----------|-----------|-----------|
| C        | 0.000000  | 0.463959  | 0.000000  |
| N        | -1.337324 | 0.374606  | 0.000000  |
| N        | 0.812273  | -0.582228 | 0.000000  |
| N        | -1.833709 | -0.817478 | 0.000000  |
| N        | 0.246114  | -1.765723 | 0.000000  |
| N        | -1.048922 | -1.888866 | 0.000000  |
| C        | 1.910550  | 1.822829  | 0.000000  |
| H        | 2.093276  | 2.891976  | 0.000000  |
| H        | 2.337885  | 1.358131  | 0.887072  |
| H        | 2.337885  | 1.358131  | -0.887072 |
| O        | 0.487329  | 1.678606  | 0.000000  |

| Transition state |           |           |           |
|------------------|-----------|-----------|-----------|
| C                | 0.000000  | 0.451270  | 0.000000  |
| N                | -1.378850 | -0.092078 | 0.000000  |
| N                | 1.054295  | -0.201033 | 0.000000  |
| N                | -1.648726 | -1.236463 | 0.000000  |
| N                | 0.826352  | -1.842118 | 0.000000  |
| N                | -0.242311 | -2.312780 | 0.000000  |
| C                | 1.098419  | 2.490017  | 0.000000  |
| H                | 0.828187  | 3.540862  | 0.000000  |
| H                | 1.679913  | 2.239529  | 0.887011  |
| H                | 1.679913  | 2.239529  | -0.887011 |
| O                | -0.131731 | 1.765458  | 0.000000  |

## OEt-Pentazine

| Reactant |           |           |           |
|----------|-----------|-----------|-----------|
| C        | 0.000000  | 0.274766  | 0.000000  |
| N        | 0.282364  | 1.585519  | 0.000000  |
| N        | 0.920176  | -0.679543 | 0.000000  |
| N        | 1.533455  | 1.905475  | 0.000000  |
| N        | 2.172120  | -0.288853 | 0.000000  |
| N        | 2.480786  | 0.975228  | 0.000000  |
| O        | -1.271198 | -0.032003 | 0.000000  |
| C        | -1.632369 | -1.427353 | 0.000000  |
| H        | -1.194957 | -1.898619 | 0.881340  |
| H        | -1.194957 | -1.898619 | -0.881340 |
| C        | -3.137261 | -1.494391 | 0.000000  |
| H        | -3.544379 | -1.006692 | 0.884852  |
| H        | -3.544379 | -1.006692 | -0.884852 |
| H        | -3.456264 | -2.536271 | 0.000000  |

| Transition state |           |           |           |
|------------------|-----------|-----------|-----------|
| C                | 0.000000  | 0.100240  | 0.000000  |
| N                | -0.258342 | 1.562206  | 0.000000  |
| N                | 1.108845  | -0.455101 | 0.000000  |
| N                | 0.575942  | 2.390526  | 0.000000  |
| N                | 2.386813  | 0.597690  | 0.000000  |
| N                | 2.229779  | 1.754862  | 0.000000  |
| O                | -1.188057 | -0.474233 | 0.000000  |
| C                | -1.172565 | -1.911556 | 0.000000  |
| H                | -0.623243 | -2.248810 | 0.881443  |
| H                | -0.623243 | -2.248810 | -0.881443 |
| C                | -2.604308 | -2.380450 | 0.000000  |
| H                | -3.127520 | -2.019737 | 0.884910  |
| H                | -3.127520 | -2.019737 | -0.884910 |
| H                | -2.634037 | -3.469739 | 0.000000  |

## Me-Pentazine

| Reactant |           |           |           |
|----------|-----------|-----------|-----------|
| C        | 0.000000  | 0.797171  | 0.000000  |
| N        | -1.167226 | 0.147789  | 0.000000  |
| N        | 1.170460  | 0.165433  | 0.000000  |
| N        | -1.134883 | -1.152703 | 0.000000  |
| N        | 1.150898  | -1.142825 | 0.000000  |
| N        | 0.015576  | -1.793885 | 0.000000  |
| C        | -0.020433 | 2.282787  | 0.000000  |
| H        | -0.557909 | 2.641848  | 0.877868  |
| H        | 0.994643  | 2.669889  | 0.000000  |
| H        | -0.557909 | 2.641848  | -0.877868 |

| Transition state |           |           |           |
|------------------|-----------|-----------|-----------|
| C                | 0.841673  | -0.187553 | 0.000003  |
| N                | 0.196555  | -1.243687 | 0.000004  |
| N                | 0.227002  | 1.199562  | 0.000020  |
| N                | -1.415512 | -1.086518 | 0.000009  |
| N                | -0.938174 | 1.390904  | -0.000003 |
| N                | -1.930150 | -0.030840 | -0.000026 |
| C                | 2.320279  | -0.070737 | -0.000005 |
| H                | 2.631640  | 0.497469  | 0.878104  |
| H                | 2.786977  | -1.051166 | -0.000022 |
| H                | 2.631628  | 0.497493  | -0.878103 |

### F-Pentazine

| Reactant |           |           |           |
|----------|-----------|-----------|-----------|
| C        | 0.000000  | -0.000000 | 0.822176  |
| N        | 0.000000  | 1.173383  | 0.226398  |
| N        | -0.000000 | -1.173383 | 0.226398  |
| N        | -0.000000 | 1.144022  | -1.080828 |
| N        | -0.000000 | -1.144022 | -1.080828 |
| N        | -0.000000 | 0.000000  | -1.723615 |
| F        | 0.000000  | -0.000000 | 2.121585  |

| Transition state |           |           |          |
|------------------|-----------|-----------|----------|
| C                | 0.000000  | 0.887752  | 0.000000 |
| N                | 1.177455  | 0.534124  | 0.000000 |
| N                | -1.188980 | 0.052816  | 0.000000 |
| N                | 1.334595  | -1.132395 | 0.000000 |
| N                | -1.190992 | -1.127567 | 0.000000 |
| N                | 0.397272  | -1.829848 | 0.000000 |
| F                | -0.411716 | 2.132621  | 0.000000 |

### Cl-Pentazine

| Reactant |           |           |           |
|----------|-----------|-----------|-----------|
| C        | 0.000000  | 0.000000  | 0.426454  |
| N        | 0.000000  | 1.172977  | -0.188716 |
| N        | -0.000000 | -1.172977 | -0.188716 |
| N        | 0.000000  | 1.143176  | -1.494922 |
| N        | -0.000000 | -1.143176 | -1.494922 |
| N        | 0.000000  | -0.000000 | -2.139136 |
| Cl       | 0.000000  | 0.000000  | 2.116833  |

| Transition state |           |           |           |
|------------------|-----------|-----------|-----------|
| C                | -0.465554 | -0.163737 | 0.072634  |
| N                | 0.135347  | -1.232814 | 0.232123  |
| N                | 0.152226  | 1.168633  | 0.133186  |
| N                | 1.756413  | -1.081637 | -0.046086 |
| N                | 1.314683  | 1.370701  | 0.057498  |
| N                | 2.255886  | -0.036372 | -0.218169 |
| Cl               | -2.147562 | -0.019833 | -0.090921 |

### Br-Pentazine

| Reactant |           |           |           |
|----------|-----------|-----------|-----------|
| C        | -0.000000 | -0.000000 | -0.149745 |
| N        | 0.000000  | 1.172470  | -0.765434 |
| N        | -0.000000 | -1.172470 | -0.765434 |
| N        | 0.000000  | 1.143293  | -2.072558 |
| N        | -0.000000 | -1.143293 | -2.072558 |
| N        | -0.000000 | -0.000000 | -2.716142 |
| Br       | 0.000000  | 0.000000  | 1.704096  |

| Transition state |           |           |           |
|------------------|-----------|-----------|-----------|
| C                | 0.119767  | -0.156736 | 0.109280  |
| N                | 0.719211  | -1.226945 | 0.269366  |
| N                | 0.746339  | 1.168703  | 0.163986  |
| N                | 2.328994  | -1.084724 | -0.060684 |
| N                | 1.909942  | 1.360311  | 0.054901  |
| N                | 2.824648  | -0.041489 | -0.261623 |
| Br               | -1.726358 | -0.008302 | -0.051923 |

### CF<sub>3</sub>-Pentazine

| Reactant |           |           |           |
|----------|-----------|-----------|-----------|
| C        | -0.011062 | 0.130202  | 0.000000  |
| N        | 1.243204  | 0.557919  | 0.000000  |
| N        | -1.074299 | 0.906531  | 0.000000  |
| N        | 1.418156  | 1.848599  | 0.000000  |
| N        | -0.848471 | 2.200376  | 0.000000  |
| N        | 0.376574  | 2.657739  | 0.000000  |
| C        | -0.199848 | -1.385642 | 0.000000  |
| F        | 0.376574  | -1.905437 | 1.077812  |
| F        | -1.479892 | -1.707516 | 0.000000  |
| F        | 0.376574  | -1.905437 | -1.077812 |

| Transition state |           |           |           |
|------------------|-----------|-----------|-----------|
| C                | -0.091116 | 0.169725  | -0.067948 |
| N                | -0.689782 | 1.241207  | -0.215446 |
| N                | -0.703923 | -1.175294 | -0.109563 |
| N                | -2.288767 | 1.110199  | 0.032319  |
| N                | -1.874803 | -1.347257 | -0.062230 |
| N                | -2.799083 | 0.061620  | 0.180286  |
| C                | 1.418440  | 0.039959  | 0.023956  |
| F                | 1.998328  | 1.220119  | 0.120250  |
| F                | 1.731410  | -0.686276 | 1.095419  |
| F                | 1.884768  | -0.588446 | -1.050515 |

### CN-Pentazine

| Reactant |           |           |           |
|----------|-----------|-----------|-----------|
| C        | 0.000000  | 0.494933  | 0.000000  |
| N        | 0.000000  | -0.122745 | 1.176228  |
| N        | 0.000000  | -0.122745 | -1.176228 |
| N        | 0.000000  | -1.428037 | 1.146551  |
| N        | 0.000000  | -1.428037 | -1.146551 |
| N        | -0.000002 | -2.069601 | 0.000000  |
| C        | 0.000000  | 1.937083  | 0.000000  |
| N        | 0.000003  | 3.086580  | 0.000000  |

| Transition state |           |           |           |
|------------------|-----------|-----------|-----------|
| C                | 0.536186  | -0.147394 | 0.091776  |
| N                | -0.079335 | -1.202857 | 0.362167  |
| N                | -0.116844 | 1.178968  | 0.159591  |
| N                | -1.609057 | -1.089196 | -0.103395 |
| N                | -1.283294 | 1.347301  | 0.091535  |
| N                | -2.143038 | -0.068846 | -0.327640 |
| C                | 1.956157  | -0.061188 | -0.063260 |
| N                | 3.095274  | 0.013416  | -0.206700 |

## NO<sub>2</sub>-Pentazine

### Reactant

|   |           |           |           |
|---|-----------|-----------|-----------|
| C | 0.236280  | 0.182440  | 0.000000  |
| N | 0.261569  | -0.415102 | 1.174220  |
| N | 0.261569  | -0.415102 | -1.174220 |
| N | 0.261569  | -1.722220 | 1.146372  |
| N | 0.261569  | -1.722220 | -1.146372 |
| N | 0.243605  | -2.363003 | 0.000000  |
| N | 0.296560  | 1.613995  | 0.000000  |
| O | -0.782672 | 2.129433  | 0.716587  |
| O | -0.782672 | 2.129433  | -0.716587 |

### Transition state

|   |           |           |           |
|---|-----------|-----------|-----------|
| C | -0.170392 | -0.106032 | 0.234850  |
| N | 0.335818  | -1.216012 | 0.069192  |
| N | 0.479093  | 1.214476  | 0.171713  |
| N | 1.966233  | -1.150684 | -0.123611 |
| N | 1.635930  | 1.347402  | -0.038130 |
| N | 2.527457  | -0.122524 | -0.171571 |
| N | -1.539572 | 0.126300  | 0.598450  |
| O | -2.381020 | -0.727400 | -0.101048 |
| O | -2.220525 | 0.632835  | -0.517879 |

## XYZ optimized geometries of Hexazine using different functionals

Hexazine (D<sub>2</sub>)

HCTH/Def2-TZVP

|   |           |           |           |
|---|-----------|-----------|-----------|
| N | 1.119333  | 0.241435  | -0.629667 |
| N | 1.119333  | -0.241435 | 0.629667  |
| N | 0.000000  | 0.000000  | -1.232201 |
| N | 0.000000  | 0.000000  | 1.232201  |
| N | -1.119333 | -0.241435 | -0.629667 |
| N | -1.119333 | 0.241435  | 0.629667  |

TPSSH/Def2-TZVP

|   |           |           |           |
|---|-----------|-----------|-----------|
| N | 1.127678  | 0.216207  | -0.632138 |
| N | 1.127678  | -0.216207 | 0.632138  |
| N | 0.000000  | 0.000000  | -1.257501 |
| N | 0.000000  | 0.000000  | 1.257501  |
| N | -1.127678 | -0.216207 | -0.632138 |
| N | -1.127678 | 0.216207  | 0.632138  |

PBE0/Def2-TZVP

|   |           |           |           |
|---|-----------|-----------|-----------|
| N | 1.121367  | 0.184213  | -0.630708 |
| N | 1.121367  | -0.184213 | 0.630708  |
| N | 0.000000  | 0.000000  | -1.264029 |
| N | 0.000000  | 0.000000  | 1.264029  |
| N | -1.121367 | -0.184213 | -0.630708 |
| N | -1.121367 | 0.184213  | 0.630708  |

M062X/Def2-TZVP

|   |           |           |           |
|---|-----------|-----------|-----------|
| N | 1.125744  | 0.118898  | -0.641703 |
| N | 1.125744  | -0.118898 | 0.641703  |
| N | 0.000000  | 0.000000  | -1.289770 |
| N | 0.000000  | 0.000000  | 1.289770  |
| N | -1.125744 | -0.118898 | -0.641703 |
| N | -1.125744 | 0.118898  | 0.641703  |

## Orca Input files

### Pentazine

```
%pal nprocs 16 end
%maxcore 7000
! ccsd(t) extrapolate(3/4,cc) TightSCF
*xyz 0 1
C 0.000000 0.000000 -1.250593
N 0.000000 1.171841 -0.631606
N -0.000000 -1.171841 -0.631606
N 0.000000 1.145996 0.675704
N -0.000000 -1.145996 0.675704
N 0.000000 -0.000000 1.317064
H 0.000000 0.000000 -2.333265
*
```

### Hexazine

```
%pal nprocs 16 end
%maxcore 7000
! dlpno-ccsd(t) cc-pVTZ cc-pVTZ/C TIGHTSCF opt freq
*xyz 0 1
N 1.140867 0.144241 -0.646921
N 1.140867 -0.144241 0.646921
N -0.000000 0.000000 -1.301970
N 0.000000 0.000000 1.301970
N -1.140867 -0.144241 -0.646921
N -1.140867 0.144241 0.646921
*
```



## Example of Polyrate input file (.dat file):

```

*GENERAL                                     *PATH                                     373.15
TITLE                                       #SYMMETRY                               375
  QMT_computation                          INTMU 3                                 400
END                                         SSTEP 0.001                             END
#DL ISPE                                   SRANGE                                  ANALYSIS
ATOMS                                       SLP 20.                                  4
  1 N                                       SLM -20.                                 5
  2 N                                       END                                       6
  3 N                                       SPECSTOP                                  7
  4 N                                       CURVE VMEP                               8
  5 N                                       PERCENTDOWN 99.9                         9
  6 N                                       END                                       10
END                                         PRPATH                                    12
NOSUPERMOL                                coord 1 2                                14
                                           xmol                                     16
                                           freq 15                                  18
                                           END                                       20
*SECOND                                     *TUNNEL                                  22
HESSCAL hhook                             ZCT                                       24
FPRINT                                     SCT                                       26
*OPTIMIZATION                             QRST                                    28
PRINT                                       harmonic                                  30
                                           mode 15                                  40
                                           states all                               50
                                           END                                       75
                                           77.355
OPTMIN ohook                               100
OPTTS ohook                                125
*REACT1                                    *RATE                                    150
INITGEO hooks                              FORWARDK                                  175
GEOM                                        SIGMAF 1                                 194.7
  1                                        CVT                                       200
  2                                        PRDELG                                  225
  3                                        PRPART rtp                              250
  4                                        TEMP                                     273.15
  5                                        4                                       275
  6                                        5                                       298.15
END                                         6                                       300
SPECIES nonlinrp                           7                                       325
                                           8                                       350
                                           9                                       373.15
                                           10                                      375
                                           12                                      400
                                           14                                      END
                                           16                                      EACT
                                           18                                      6. 10.
                                           20                                      10. 20.
                                           22                                      20. 50.
                                           24                                      50. 100.
                                           26                                      200. 225.
                                           28                                      300. 325.
                                           30                                      END
                                           40                                      GTLOG
                                           50
*PROD1                                     75
INITGEO hooks                              77.355
GEOM                                        100
  1                                        125
  2                                        150
  3                                        175
  4                                        194.7
  5                                        200
  6                                        225
END                                         250
SPECIES nonlinrp                           273.15
PROJECT                                    275
                                           298.15
                                           300
                                           325
                                           350

```

## Full References

35. Frisch, M. J.; Trucks, G. W.; Schlegel, H. B.; Scuseria, G. E.; Robb, M. A.; Cheeseman, J. R.; Scalmani, G.; Barone, V.; Mennucci, B.; Petersson, G. A.; Nakatsuji, H.; Caricato, M.; Li, X.; Hratchian, H. P.; Izmaylov, A. F.; Bloino, J.; Zheng, G.; Sonnenberg, J. L.; Hada, M.; Ehara, M.; Toyota, K.; Fukuda, R.; Hasegawa, J.; Ishida, M.; Nakajima, T.; Honda, Y.; Kitao, O.; Nakai, H.; Vreven, T.; Montgomery, J. A., Jr.; Peralta, J. E.; Ogliaro, F.; Bearpark, M.; Heyd, J. J.; Brothers, E.; Kudin, K. N.; Staroverov, V. N.; Kobayashi, R.; Normand, J.; Raghavachari, K.; Rendell, A.; Burant, J. C.; Iyengar, S. S.; Tomasi, J.; Cossi, M.; Rega, N.; Millam, J. M.; Klene, M.; Knox, J. E.; Cross, J. B.; Bakken, V.; Adamo, C.; Jaramillo, J.; Gomperts, R.; Stratmann, R. E.; Yazyev, O.; Austin, A. J.; Cammi, R.; Pomelli, C.; Ochterski, J. W.; Martin, R. L.; Morokuma, K.; Zakrzewski, V. G.; Voth, G. A.; Salvador, P.; Dannenberg, J. J.; Dapprich, S.; Daniels, A. D.; Farkas, Ö.; Foresman, J. B.; Ortiz, J. V.; Cioslowski, J.; Fox, D. J. Gaussian16 Revision C.01.
38. J. Zheng, J. L. Bao, S. Zhang, J. C. Corchado, R. Meana-Pañeda, Y.-Y. Chuang, E. L. Coitiño, B. A. Ellingson, and D. G. Truhlar, Gaussrate 17, University of Minnesota, Minneapolis, MN, 2017.
39. Zheng, J.; Bao, J. L.; Meana-Pañeda, R.; Zhang, S.; Lynch, B. J.; Corchado, J. C.; Chuang, Y.-Y.; Fast, P. L.; Hu, W.-P.; Liu, Y.-P.; Lynch, G. C.; Nguyen, K. A.; Jackels, C. F.; Fernandez Ramos, A.; Ellingson, B. A.; Melissas, V. S.; Villà, J. Rossi, I.; Coitiño, E. L.; Pu, J.; Albu, T. V.; Ratkiewicz, A.; Steckler, R.; Garrett, B. C.; Isaacson, A. D.; Truhlar, D. G. Polyrate-version 2017-C; University of Minnesota: Minneapolis, 2017.
